# Supplementary material for: Induced crystallization of rubrene with diazapentacene as the template
Source: Royal Society of Chemistry journal article supplement (doi:10.1039/c2jm14941a), 2012-01-01
Supplement: c2jm14941a.pdf [file c2jm14941a.pdf]

## Electronic Supplementary Information for:

### Induced Crystallization of Rubrene with Diazapentacene as the Template

Danqing Liu,<sup>1</sup> Zhefeng Li,<sup>1</sup> Zikai He,<sup>1</sup> Jianbin Xu,<sup>2</sup> Qian Miao\*<sup>1,3</sup>

<sup>1</sup>Department of Chemistry, Department of Electronic Engineering and <sup>3</sup>Center of Novel Functional Molecules, the Chinese University of Hong Kong, Shatin, New Territories, Hong Kong, China

#### 1. Materials

Rubrene was purchased from International Laboratory USA, and purified with a physical vapor transport system<sup>1</sup> prior to device fabrication. Octadecyltrimethoxysilane (OTMS) and octadecylphosphonic acid (ODPA) were purchased from Aldrich and International Laboratory USA respectively, and were both used without purification. 6,13-diazapentacene (DAP) was prepared by oxidizing 6,13-dihydro-6,13-diazapentacene<sup>2</sup> following the reported method<sup>3</sup> and purified with a physical vapor transport system prior to device fabrication.

#### 2. Cyclic voltammetry

The cyclic voltammetry of DAP was performed in a saturated solution in anhydrous DMF with 0.1M tetrabutylammonium hexafluorophosphate (Bu<sub>4</sub>NPF<sub>6</sub>) as the supporting electrolyte, at a scan rate of 50mV/s. A platinum bead was used as a working electrode, with a platinum wire as an auxiliary electrode and a silver wire was used as a pseudo-reference. Ferrocene/ferrocenium was used as an internal standard, and potentials were recorded versus FeCp<sub>2</sub><sup>+</sup>/FeCp<sub>2</sub><sup>0</sup>.

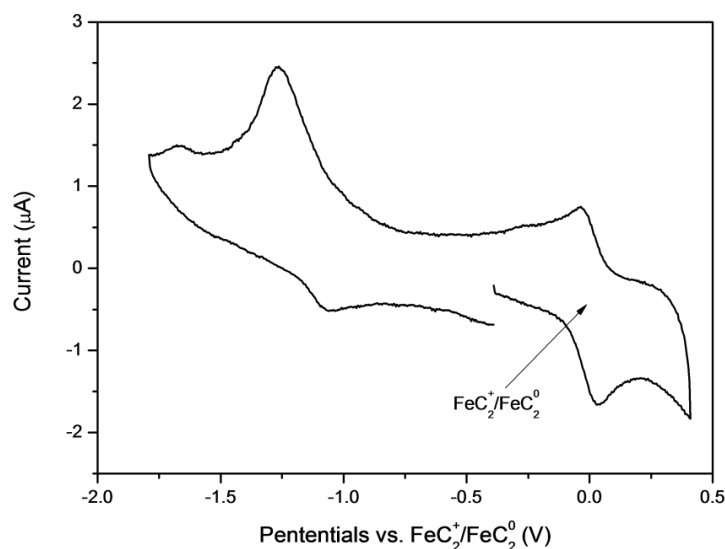

**Figure S-1** Cyclic voltammogram of DAP recorded in DMF with FeCp<sub>2</sub><sup>+</sup>/FeCp<sub>2</sub><sup>0</sup> as the internal standard.

1. R. A. Laudise, C. Kloc, P. G. Simpkins, T. Siegrist, *J. Cryst. Growth* **1998**, 187, 449.
2. Q. Miao, T.-Q. Nguyen, T. Someya, G. B. Blanchet, C. Nuckolls, *J. Am. Chem. Soc.* **2003**, 125, 10284.
3. J. A. VanAllan, R. E. Adel, G. A. Reynolds, *J. Org. Chem.* **1962**, 27, 2873.

### 3. UV-vis absorption spectroscopy

UV-vis absorption spectra were recorded on a Varian CARY 1E UV-vis spectrophotometer. The 40nm-thick thin film of DAP for UV-vis absorption spectroscopy was deposited on a quartz wafer.

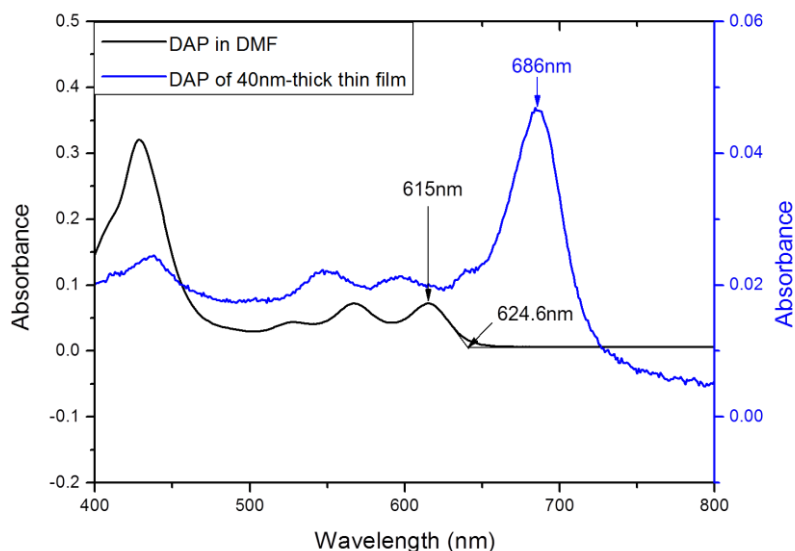

**Figure S-2** Absorbance spectra of DAP in DMF at a concentration of  $1 \times 10^{-5}$  mol/L and in 40nm-thick thin film.

**Table S-1** Reduction, absorption edge and estimated frontier molecular orbital energy levels of DAP

| $E_{\text{red}}^{1/2}$ vs. $\text{Fc}^+/\text{Fc}$ | Absorption edge | Optical gap | LUMO [a] | HOMO [b] |
|----------------------------------------------------|-----------------|-------------|----------|----------|
| -1.17V                                             | 624.6 nm        | 1.93eV      | -3.63eV  | -5.56eV  |

[a] Estimated from  $E_{\text{LUMO}} = -4.80 - E_{\text{red}} \text{ (eV)}$ . [b] Calculated from  $E_{\text{LUMO}} = \text{Gap} + E_{\text{HOMO}}$

### 4. Deposition of thin films and fabrication of thin film transistors

Thin films for UV-vis absorption were deposited on quartz plates and thin films for other experiments were deposited on silicon wafers, which had 300 nm-thick  $\text{SiO}_2$  on highly n-doped Si. The  $\text{SiO}_2$  surface was modified with octadecylphosphonic acid (ODPA)<sup>5</sup> or octadecyltrimethoxysilane (OTMS)<sup>6</sup> as needed by following the reported procedures. All thin films were vacuum-deposited by an Edward Auto 306 vacuum coating system with a Turbomolecular pump at a pressure of  $2.0 \times 10^{-6}$  torr or lower, with a deposition rate of ca. 2 nm/min to desired thickness as measured by a quartz crystal sensor. DAP was chemically

4. The commonly used HOMO energy level of ferrocene is  $-4.80$  eV. See: a) J. Pommerehne, H. Vestweber, W. Guss, R. F. Mahrt, H. Bässler, M. Porsch, J. Daub, *Adv. Mater.* **1995**, *7*, 551; b) B. W. D'Andrade, S. Datta, S. R. Forrest, P. Djurovich, E. Polikarpov, M. E. Thompson, *Org. Electron.* **2005**, *6*, 11.

5. Z. Li, J. Du, Q. Tang, F. Wang, J. Xu, J. C. Yu, Q. Miao, *Adv. Mater.* **2010**, *22*, 3242.

6. Y. Ito, A. A. Virkar, S. Mannsfeld, J. H. Oh, M. Toney, A. Locklin, Z. Bao, *J. Am. Chem. Soc.* **2009**, *131*, 9396.

unchanged under the deposition conditions as found by using  $^1\text{H}$  NMR spectroscopy.<sup>7</sup> During vacuum deposition the distance between source and substrate was 18.5 cm. Substrate temperatures during deposition were achieved using a radiant heater and measured with a thermocouple.

To fabricate organic thin film transistors, top contact drain and source gold electrodes were vacuum-deposited through a shadow mask onto the films in the same vacuum chamber, and the resulting semiconducting channels were  $50\mu\text{m}(\text{L})\times 1\text{mm}(\text{W})$ ,  $100\mu\text{m}(\text{L})\times 1\text{mm}(\text{W})$ ,  $50\mu\text{m}(\text{L})\times 2\text{mm}(\text{W})$  and  $100\mu\text{m}(\text{L})\times 2\text{mm}(\text{W})$ . These transistors had highly n-doped silicon functioned as gate electrode and 300 nm-thick  $\text{SiO}_2$  as dielectrics.

## 5. X-ray diffraction (XRD) from thin films

XRD data were recorded on a SmartLab X-Ray Refractometer from the thin films of DAP and rubrene (both ca. 100nm thick) deposited on varied surfaces. (The substrate temperature was kept at  $60\text{ }^\circ\text{C}$  during the deposition of DAP and at  $90\text{ }^\circ\text{C}$  during the deposition of rubrene.)

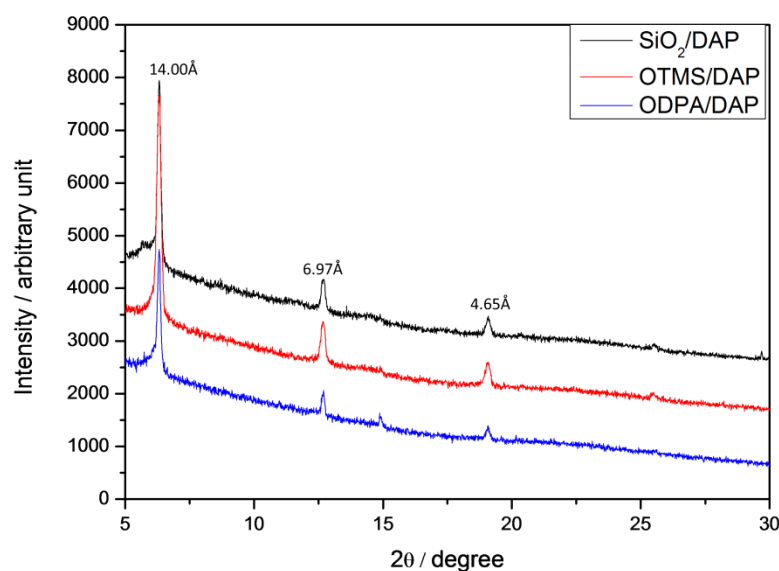

**Figure S-3** X-ray diffraction from 100 nm-thick films of DAP deposited on bare  $\text{SiO}_2$ , OTMS-modified  $\text{SiO}_2$  and ODPA-modified  $\text{SiO}_2$  at substrate temperature of  $60\text{ }^\circ\text{C}$ .

## 6. Characterization of thin film transistors

The current-voltage measurement of thin-film transistors was conducted in ambient air at room temperature using JANIS ST-500-20-4TX probe station and a Keithley 4200 Semiconductor Characterization System.

7. An 100 nm-thick film of DAP deposited on the bilayer ODPA-modified  $\text{SiO}_2$  was dissolved in  $\text{DMSO-d}_6$ , and only three sets of peaks for DAP were found in the  $^1\text{H}$  NMR spectrum.

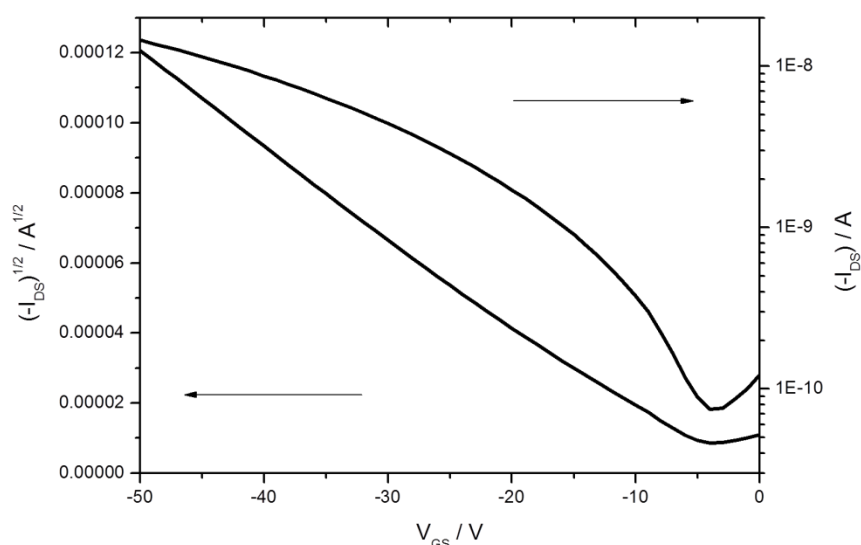

**Figure S-4** Drain current ( $I_{DS}$ ) versus gate voltage ( $V_{GS}$ ) with  $V_{DS} = -50V$  measured in air from the thin film transistors of DAP deposited on ODPA-modified  $SiO_2$  at substrate temperature of  $60\text{ }^\circ C$  with channel dimension  $W = 1mm$  and  $L = 50\mu m$ . This device exhibited hole mobility of  $6 \times 10^{-5} cm^2/Vs$  as measured from the saturation regime.

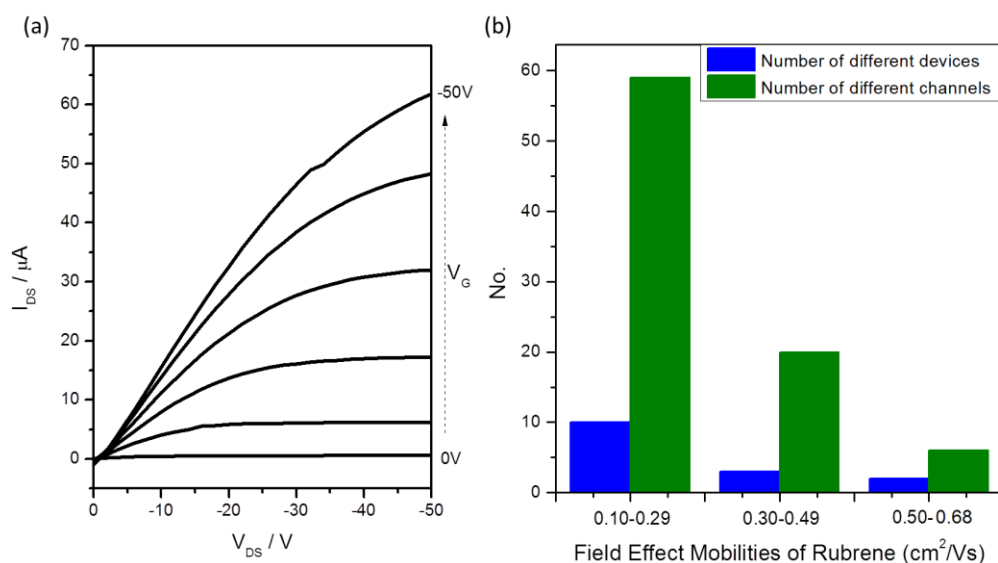

**Figure S-5** (a) Drain current ( $I_{DS}$ ) versus drain voltage ( $V_{DS}$ ) with varying gated voltage ( $V_{GS}$ , from 0 to  $-50\text{ V}$  in  $-10\text{ V}$  steps) for organic thin film transistors of rubrene deposited on ODAP--modified  $SiO_2$  at substrate temperature of  $90\text{ }^\circ C$  with channel dimension of  $W = 1\text{ mm}$  and  $L = 50\text{ }\mu m$  and (b) Summary of thin film transistor performance of rubrene deposited under high vacuum at room temperature.

## 7. Atomic force microscopy (AFM) study

Thin films of DAP (ca. 100nm thick) deposited at 60 °C on bared SiO<sub>2</sub>, OTMS-modified SiO<sub>2</sub> and ODPA-modified SiO<sub>2</sub> were used for AFM studies. The topographic images were obtained using a Nanoscope IIIa Multimode Microscope from Digital Instruments. All AFM images were collected using tapping mode and in air under ambient conditions. The topographic images were collected from multiple samples, and for each sample, different regions were scanned to ensure reproducibility.

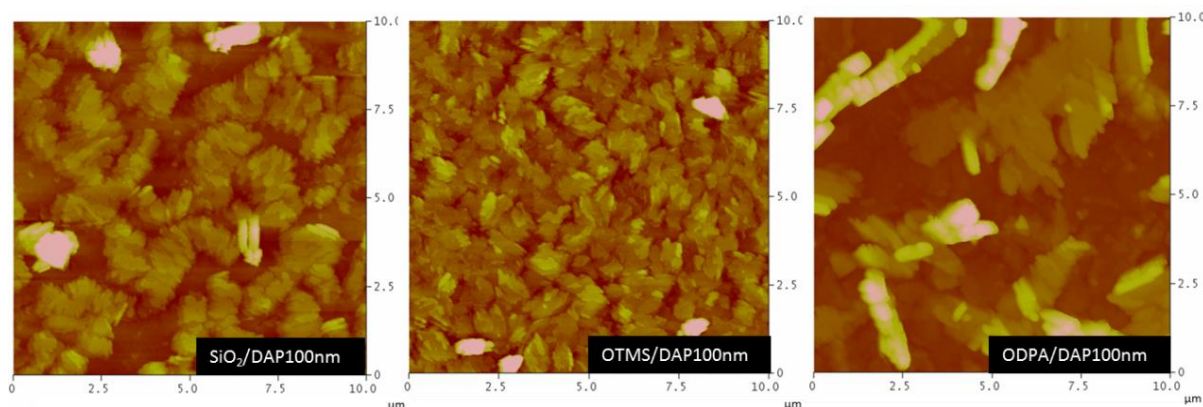

**Figure S-6** AFM height images of thin films of DAP (ca. 100nm thick) deposited on bare SiO<sub>2</sub>, OTMS-modified SiO<sub>2</sub> and ODPA-modified SiO<sub>2</sub>.

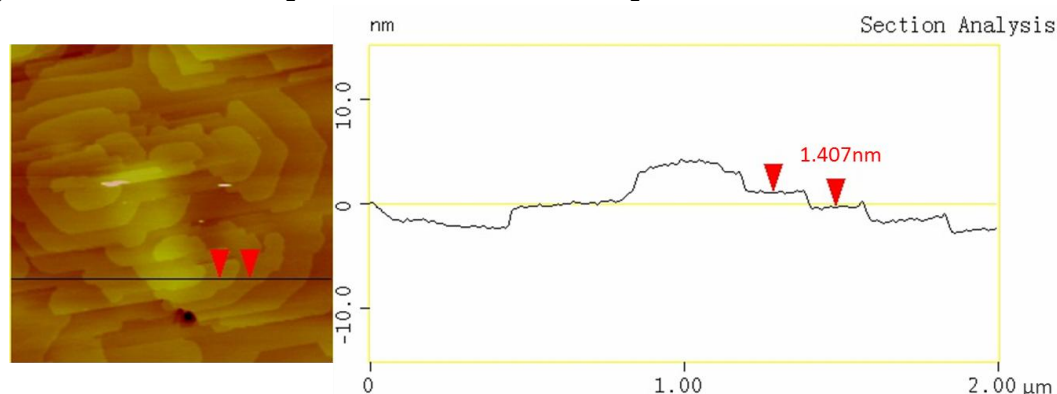

**Figure S-7** AFM height image and section analysis of the crystal surface of rubrene film, which was deposited on ODPA-modified SiO<sub>2</sub>, showing terrace height of about 1.4 nm.

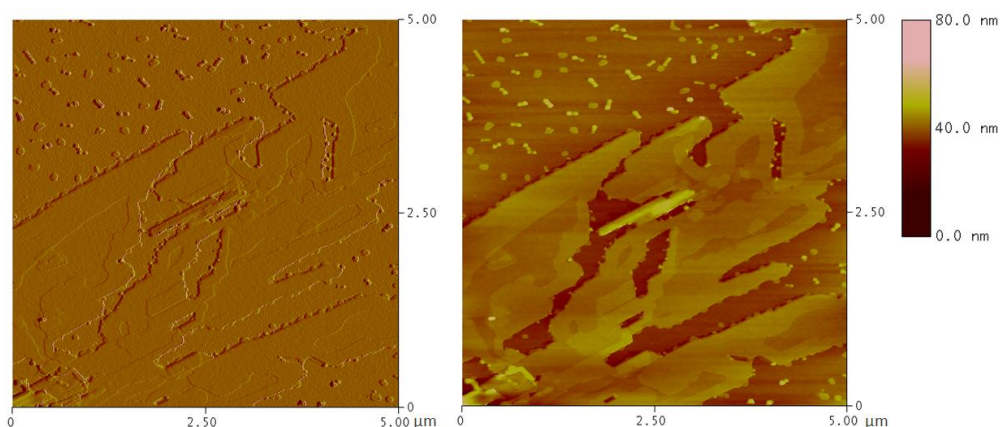

**Figure S-8** AFM amplitude (left) and height (right) images for a film containing 3 nm-thick rubrene deposited on 3 nm-thick DAP on ODPA bilayer-step surface. (Rubrene only covered part of the surface and the AFM images were taken from an area covered by rubrene.)

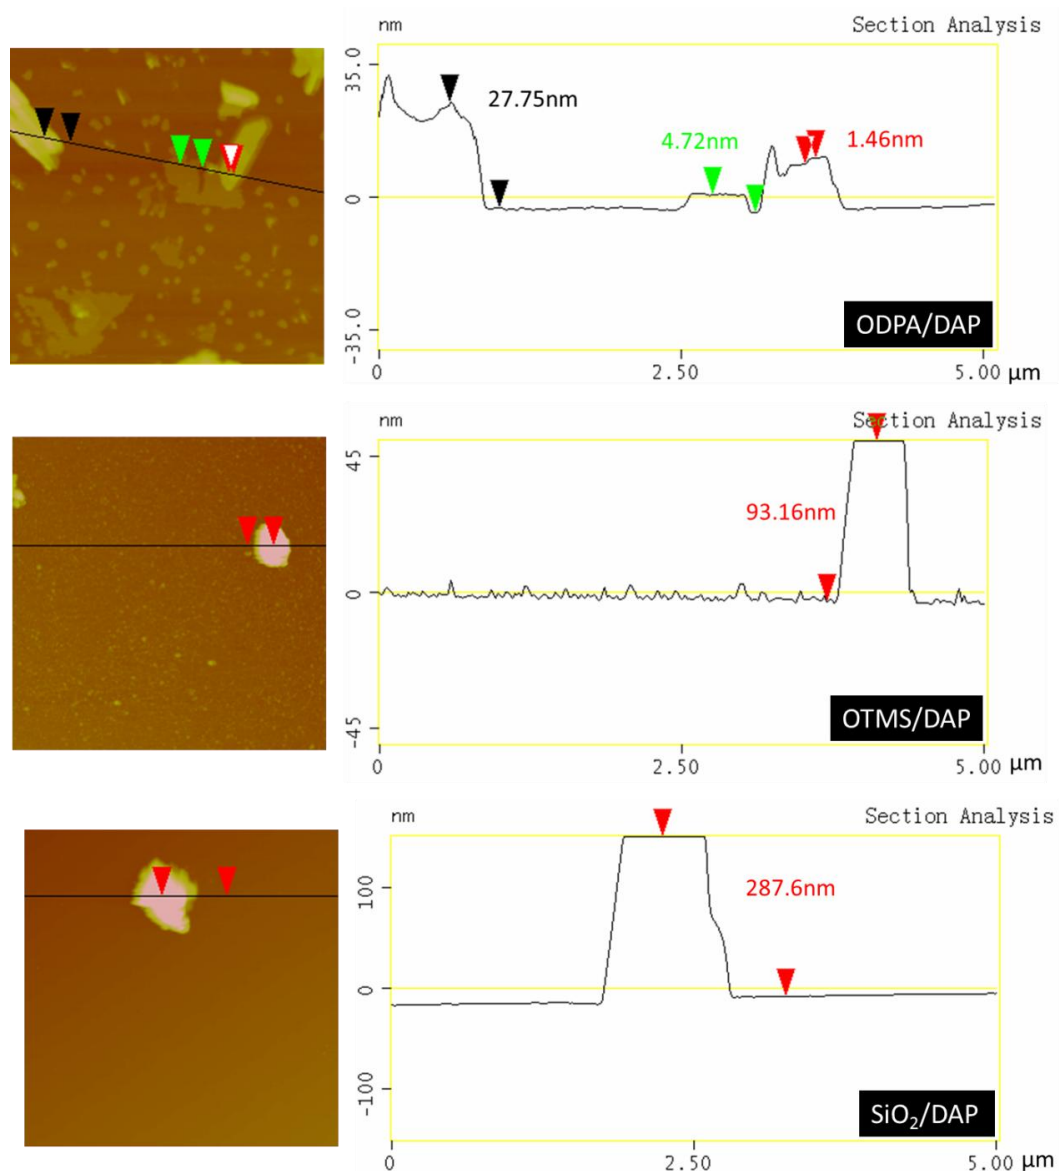

**Figure S-9** AFM section analysis for films of DAP with the nominal thickness of 3 nm deposited on the surfaces of (a) ODPA-modified SiO<sub>2</sub>, (b) OTMS-modified SiO<sub>2</sub>, (c) bare SiO<sub>2</sub>.



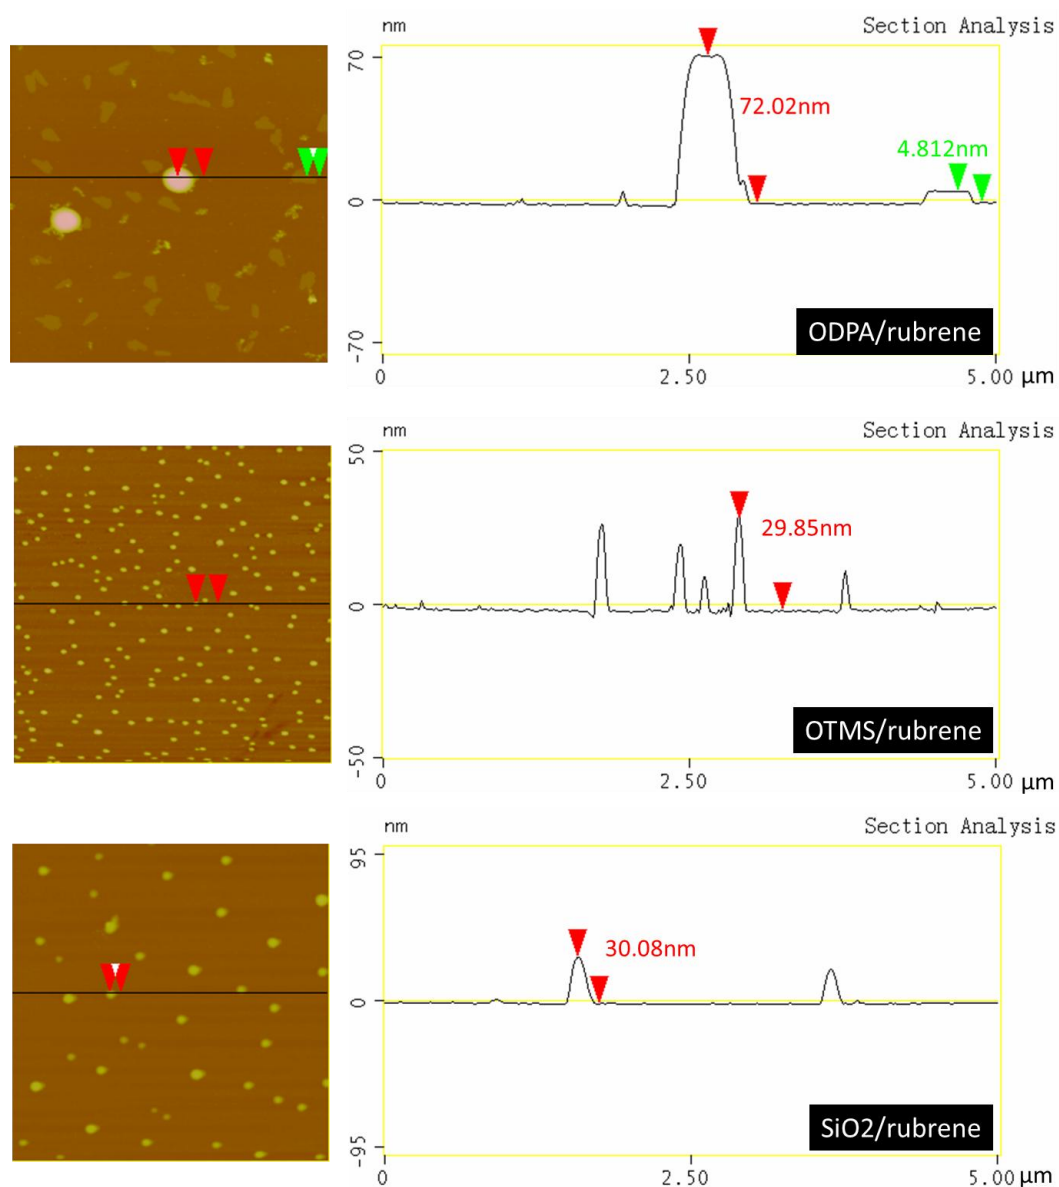

**Figure S-10** AFM section analysis for films of rubrene with the nominal thickness of 3 nm deposited on the surfaces of (a) ODPA-modified SiO<sub>2</sub>, (b) OTMS-modified SiO<sub>2</sub>, (c) bare SiO<sub>2</sub>.
